# Supplementary material for: Acupoint embedding therapy improves nonalcoholic fatty liver disease with abnormal transaminase: A PRISMA-compliant systematic review and meta-analysis
Source: PubMed Central journal article supplement (PMC7220490; doi:10.1097/md.0000000000018775), 2020-01-17
Supplement: medi-99-e18775-s004.pdf [file medi-99-e18775-s004.pdf]

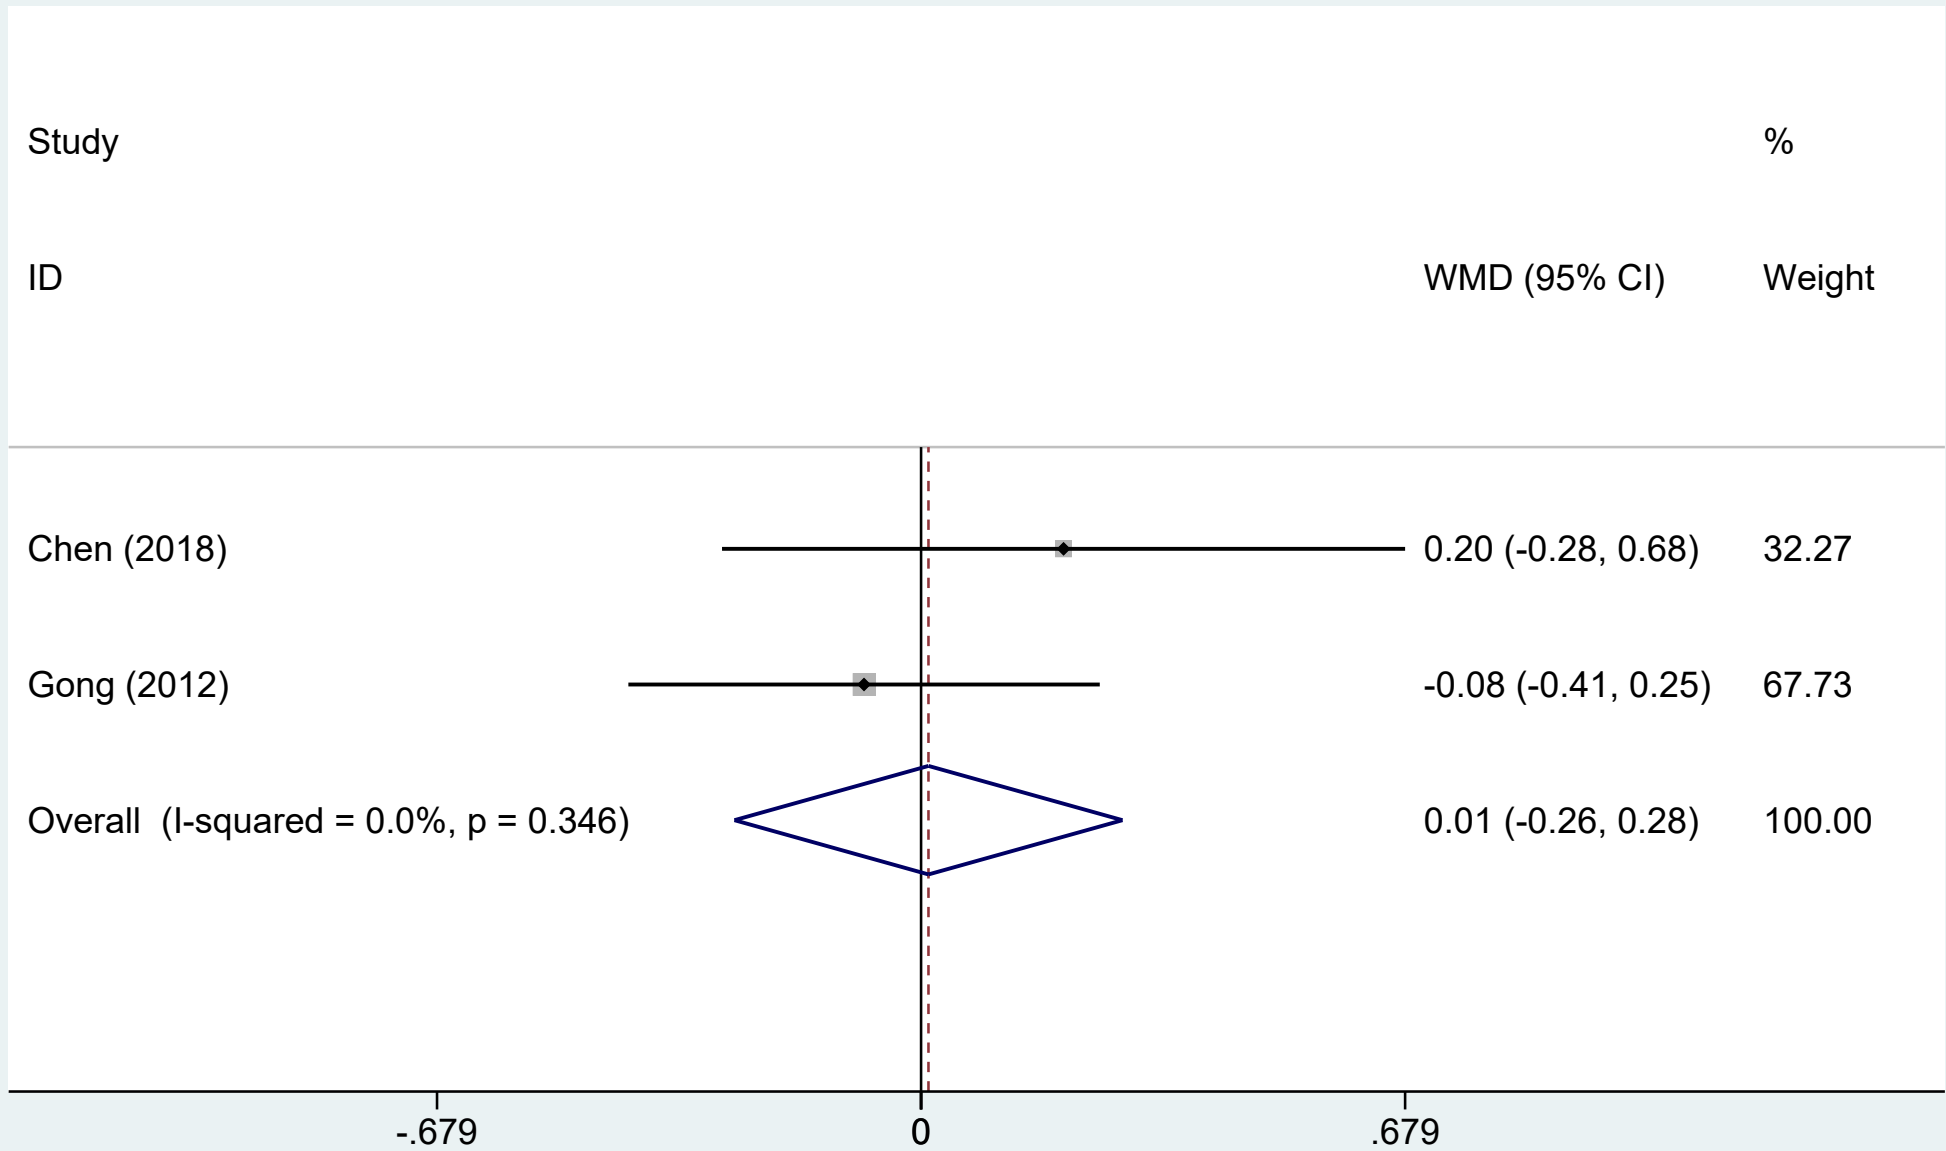

Fig. 2, Supplemental Digital Content. Forest plot of serum TG change in comparison of acupoint embedding versus electroacupuncture
